# Supplementary material for: Low-dielectric polyimide nanofoams derived from 4,4′-(hexafluoroisopropylidene)diphthalic anhydride and 2,2′-bis(trifluoromethyl)benzidine
Source: Royal Society of Chemistry journal article supplement (doi:10.1039/c6ra25604j), 2017-01-01
Supplement: c6ra25604j1.pdf [file c6ra25604j1.pdf]

**Supporting Information**

**Low-dielectric Polyimide Nanofoams**  
**Derived from**  
**4,4'-(Hexafluoroisopropylidene)diphthalic**  
**Anhydride and**  
**2,2'-Bis(trifluoromethyl)benzidine**

Pengxia Lv,<sup>a,b</sup> Zhixin Dong,<sup>a,\*</sup> Xuemin Dai,<sup>a</sup> Yong Zhao,<sup>a,b</sup> and Xuepeng Qiu<sup>a,\*</sup>

<sup>a</sup> Polymer Composites Engineering Laboratory, Changchun Institute of Applied  
Chemistry, Chinese Academy of Sciences, Changchun 130022, P. R. China

<sup>b</sup> University of Chinese Academy of Sciences, Beijing 100049, P. R. China

\*Corresponding author Tel: +86 431 85262557. Fax: +86 431 85262095

Email address: zxdong@ciac.ac.cn, xp\_q@ciac.ac.cn

**Table S1.** Temperatures of 5% and 10% weight loss of PI nanofoams after removal of the PEG content.

| <b>PEG Content (wt%)</b> | <b><math>T_{5\%}</math> (°C)</b> | <b><math>T_{10\%}</math> (°C)</b> |
|--------------------------|----------------------------------|-----------------------------------|
| 0                        | 528.2                            | 549.0                             |
| 3                        | 520.2                            | 541.2                             |
| 5                        | 523.9                            | 546.7                             |
| 10                       | 523.6                            | 545.1                             |
| 12                       | 523.7                            | 544.3                             |
| 15                       | 524.3                            | 546.8                             |
| 20                       | 522.7                            | 543.8                             |

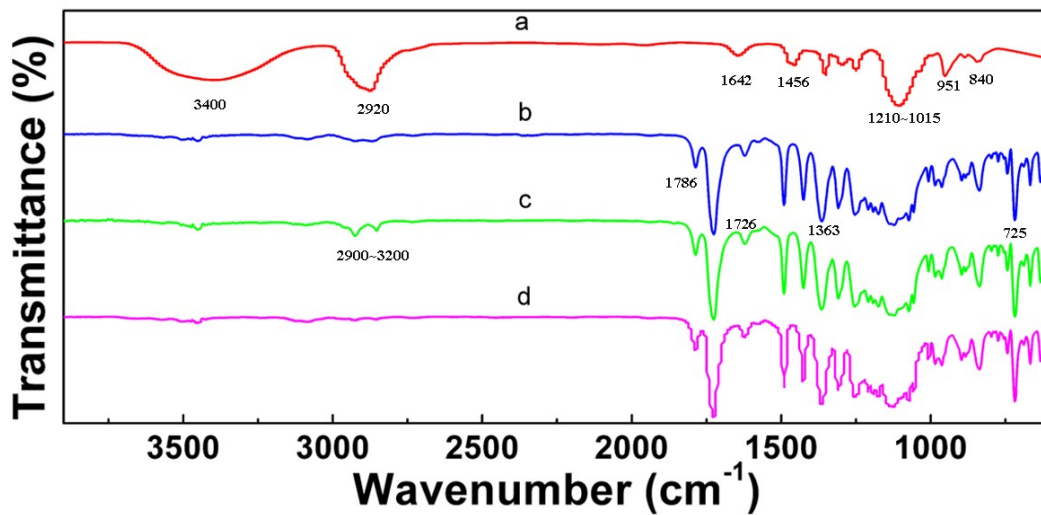

**Figure S1.** FT-IR spectra of (a) PEG-600, (b) pure PI film, (c) PI/PEG composite film, and (d) PI nanofoams.

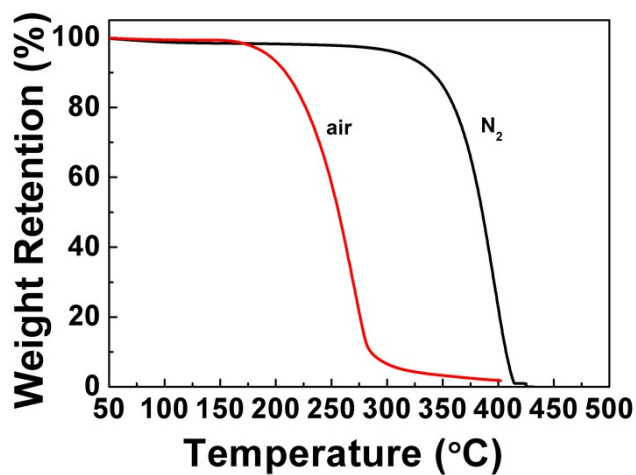

**Figure S2.** TGA curves of PEG-600 in air and nitrogen atmosphere.

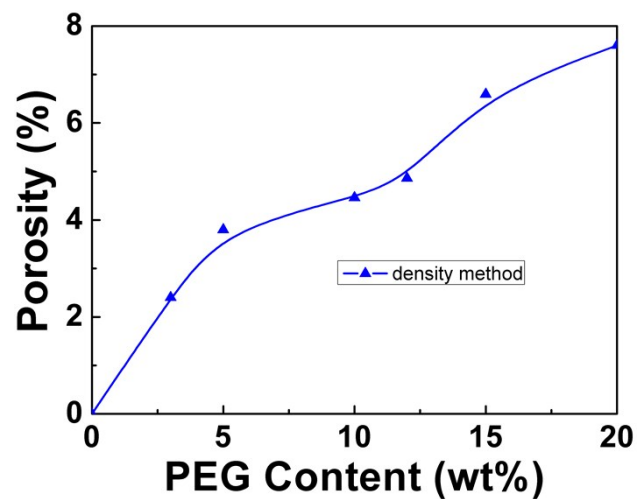

**Figure S3.** Porosity of PI nanofoams in the function of PEG content.

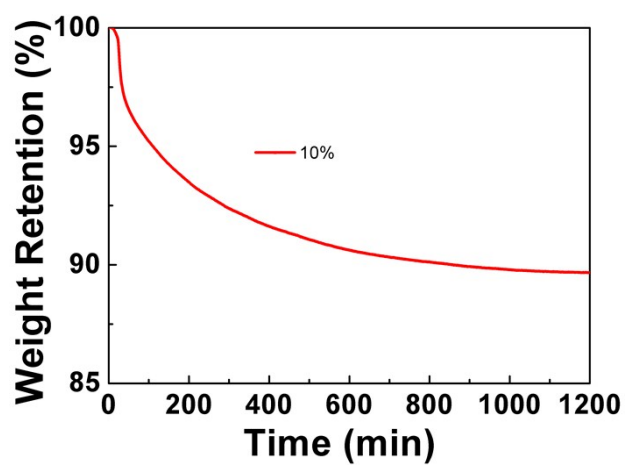

**Figure S4.** Isothermal TGA analysis of PI/PEG composite film (10 wt%) in air at 260 °C for 1200 min.

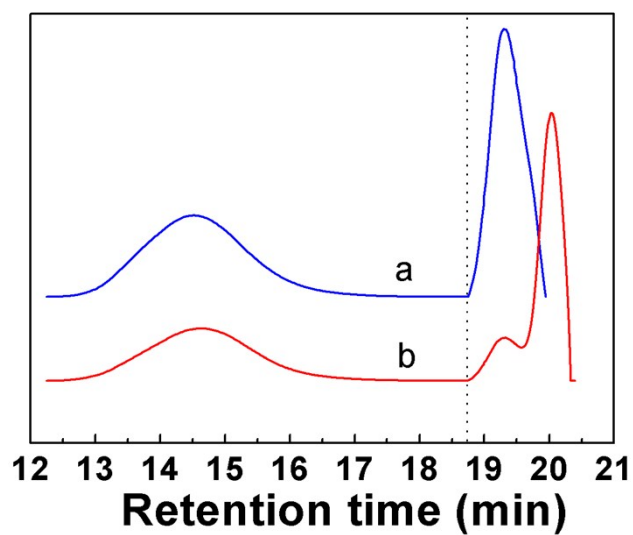

Figure S5. GPC curves of (a) PI/PEG composite film before thermal decomposition process, (b) PI nanofoam with PEG decomposed partly (175 °C for 1 h, 225 °C for 0.5 h at a heating rate of 1 °C/min in air).
